# Supplementary material
Source: publisher figshare collection journal article supplement (https://brill.figshare.com/articles/dataset/_/14915640)
Supplement: Supplementary file 1 [file 1]

## Male homophily in South American herpetology: one of the major processes underlying the gender gap in publications

Jimena Grosso<sup>1,2,3,a</sup>, Jessica Fratani<sup>3,\*b</sup>, Gabriela Fontanarrosa<sup>4,c</sup>, Mariana Chuliver<sup>5,d</sup>, Ana Sofía Duport-Bru<sup>3,4,e</sup>, Rosio Gabriela Schneider<sup>6,7,f</sup>, María Dolores Casagrande<sup>3,g</sup>, Daiana Paola Ferraro<sup>8,h</sup>, Natalin Vicente<sup>3,i</sup>, María José Salica<sup>9,j</sup>, Laura Pereyra<sup>9,k</sup>, Regina Gabriela Medina<sup>4,10,11,l</sup>, Carla Bessa<sup>12,m</sup>, Romina Semhan<sup>3,n</sup>, Miriam Corina Vera<sup>7,o</sup>

1 - Instituto de Ciencias Marinas y Limnológicas, Universidad Austral de Chile, Valdivia, Chile

2 - Centro de Humedales Río Cruces (UACH), Valdivia, Chile

3 - Unidad Ejecutora Lillo (CONICET-FML), Tucumán, Argentina

4 - Instituto de Biodiversidad Neotropical (CONICET-UNT), Tucumán, Argentina

5 - Instituto de Bio y Geociencias del NOA (CONICET-UNSa), Salta, Argentina

6 - Instituto de Diversidad y Evolución Austral (CONICET), Chubut, Argentina

7 - Laboratorio de Genética Evolutiva, Instituto de Biología Subtropical (CONICET-UNaM), Misiones, Argentina

8 - División Herpetología, Museo Argentino de Ciencias Naturales “Bernardino Rivadavia” (CONICET), Buenos Aires, Argentina

9 - Instituto de Ecorregiones Andinas (CONICET-UNJu), Jujuy, Argentina

10 - Cátedra de Biología Animal, Facultad de Ciencias Naturales (UNT), Tucumán, Argentina

11 - Departamento de Ecología, Facultad de Ciencias Biológicas, Pontificia Universidad Católica de Chile, Santiago, Chile

12 - Instituto Nacional de Limnología (CONICET-UNL), Santa Fe, Argentina

<sup>a</sup>ORCID: 0000-0002-1897-6621

<sup>b</sup>ORCID: 0000-0002-1246-2080

<sup>c</sup>ORCID: 0000-0001-5842-2263

<sup>d</sup>ORCID: 0000-0001-6717-0459

<sup>e</sup>ORCID: 0000-0002-4619-7799

<sup>f</sup>ORCID: 0000-0001-9245-6512

<sup>g</sup>ORCID: 0000-0003-0646-0158

<sup>h</sup>ORCID: 0000-0002-9579-7096

<sup>i</sup>ORCID: 0000-0002-5772-3037

<sup>j</sup>ORCID: 0000-0001-8864-6567

<sup>k</sup>ORCID: 0000-0002-6546-4549

<sup>l</sup>ORCID: 0000-0002-7846-7781

<sup>m</sup>ORCID: 0000-0002-5967-3539

<sup>n</sup>ORCID: 0000-0002-7920-5003

<sup>o</sup>ORCID: 0000-0003-0988-1345

\*Corresponding author; e-mail: [jessicafratani@gmail.com](mailto:jessicafratani@gmail.com)

## **Supplementary material**
