# Supplementary material
Source: publisher figshare collection journal article supplement (https://brill.figshare.com/articles/dataset/_/14915640)
Supplement: Supplementary file 2 [file 1]

**Table S2.** Raw results of four analysis.

1. Influence of authorship position. CHER = Cuadernos de Herpetología; Q1-Q4 = Scimago rank

| Analysis                         |         | Estimate | SE      | t      | P         |
|----------------------------------|---------|----------|---------|--------|-----------|
| Female Proportion x First Author | General | 0.3521   | 0.1338  | 2.633  | 0.00882 * |
|                                  | Q1      | 1.3001   | 0.4024  | 3.231  | 0.00223 * |
|                                  | Q2      | 0.2351   | 0.3485  | 0.674  | 0.504     |
|                                  | Q3      | 0.2758   | 0.3187  | 0.865  | 0.391     |
|                                  | Q4      | 0.4340   | 0.2726  | 1.592  | 0.115     |
|                                  | CHER    | 0.6386   | 0.6168  | 1.035  | 0.3180    |
| Female Proportion x Last Author  | General | 0.1484   | 0.1849  | 0.803  | 0.423     |
|                                  | Q1      | 0.2202   | 0.4878  | 0.451  | 0.65769   |
|                                  | Q2      | 0.2442   | 0.3600  | 0.678  | 0.50234   |
|                                  | Q3      | -0.1252  | 0.4505  | -0.278 | 0.782815  |
|                                  | Q4      | -0.07677 | 0.32053 | -0.240 | 0.811     |
|                                  | CHER    | 0.4526   | 0.5365  | 0.844  | 0.407955  |

2. Difference between taxonomic groups

|                        | Estimate | SE     | T value | P value    |
|------------------------|----------|--------|---------|------------|
| Amphibians (intercept) | -0.7727  | 0.1069 | -7.225  | 3.53e-12 * |
| Reptiles               | -0.2680  | 0.1557 | -1.721  | 0.0861     |

3. Difference between subdiscipline of study \*

|                            | Estimate | SE     | T value | <i>P value</i> |
|----------------------------|----------|--------|---------|----------------|
| Biogeography - Ethology    | 1.0650   | 0.3295 | 3.232   | 0.001436 *     |
| Biogeography - Ecology     | 1.1241   | 0.3285 | 3.422   | 0.000753 *     |
| Biogeography - Morphology  | 0.5485   | 0.3247 | 1.689   | 0.09276        |
| Biogeography - Systematics | 0.3821   | 0.3501 | 1.092   | 0.276319       |
| Ethology - Ecology         | -0.1383  | 0.2848 | -0.486  | 0.62782        |
| Ethology - Morphology      | -0.3219  | 0.2905 | -1.108  | 0.26912        |
| Ethology - Systematics     | -0.6406  | 0.3039 | -2.108  | 0.03626 *      |
| Ecology - Morphology       | -0.1836  | 0.2938 | -0.625  | 0.532666       |
| Ecology - Systematics      | 0.7785   | 0.2948 | 2.641   | 0.00892 *      |
| Morphology - Systematics   | 0.4270   | 0.3023 | 1.413   | 0.15932        |

\*Articles of conservation and communications were excluded for present respectively, equal gender percentages or almost exclusive male authors
